# Supplementary material for: miR-542-3p Contributes to the HK2-Mediated High Glycolytic Phenotype in Human Glioma Cells
Source: MDPI journal article supplement (doi:10.3390/genes12050633), 2021-04-23
Supplement: s1 [file s1]

## **Supplemental data**

# **miR-542-3p contributes to HK2-mediated high glycolytic phenotype in human glioma cells.**

**Junhyung Kim <sup>1#</sup>, Min Woo Park <sup>1#</sup>, Young Joon Park <sup>2</sup>, Ju Won Ahn <sup>2</sup>,  
Jeong Min Sim <sup>2</sup>, Suwan Kim <sup>2</sup>, Jinhyung Heo <sup>3</sup>, Ji Hun Jeong <sup>1</sup>, Mihye  
Lee <sup>1</sup>, Jaejoon Lim <sup>2\*</sup>, and Jong-Seok Moon <sup>1\*</sup>**

## **Supplemental Table 1**

**Supplemental table 1** Information for patients with glioma

| Patient | Diagnosis                       | Grade | Age | Sex | Ki-67 | IDH<br>mutation |
|---------|---------------------------------|-------|-----|-----|-------|-----------------|
| P1      | ganglioglioma                   | I     | 28  | M   | 1%    | Wild-type       |
| P2      | ganglioglioma                   | I     | 45  | M   | 5%    | Wild-type       |
| P3      | oligodendroglioma               | II    | 40  | M   | 5%    | Mutation        |
| P4      | diffuse<br>astrocytoma          | II    | 33  | M   | 5%    | Wild-type       |
| P5      | diffuse<br>astrocytoma          | II    | 75  | F   | 7%    | Wild-type       |
| P6      | anaplastic<br>astrocytoma       | III   | 34  | M   | 5%    | Wild-type       |
| P7      | anaplastic<br>astrocytoma       | III   | 56  | F   | 20%   | Wild-type       |
| P8      | anaplastic<br>oligodendroglioma | III   | 46  | M   | 10%   | Mutation        |
| P9      | glioblastoma                    | IV    | 37  | F   | 20%   | Wild-type       |
| P10     | glioblastoma                    | IV    | 70  | F   | 30%   | Wild-type       |
| P11     | glioblastoma                    | IV    | 59  | F   | 10%   | Wild-type       |

+; Alive, M; Male, F; Female
